# Supplementary material
Source: MDPI journal article supplement (https://www.mdpi.com/2076-3905/5/1/6)
Supplement: s1 [file s1]

# Supplementary Methods: Quantitative Trait Locus and Brain Expression of HLA-DPA1 Offers Evidence of Shared Immune Alterations in Psychiatric Disorders

Ling Z. Morgan, Brandi Rollins, Adolfo Sequeira, William Byerley, Lynn E. DeLisi, Alan F. Schatzberg, Jack D. Barchas, Richard M. Myers, Stanley J. Watson, Huda Akil, William E. Bunney Jr and Marquis P. Vawter

1. Equation implemented in Partek Genomics for calculation of the interaction between probeset and diagnosis:

$$y = \mu + D + S + E + (D * E) + \sum \varepsilon$$

$y$ : expression of a gene;  $\mu$ : average expression of the gene;  $D$ : diagnosis effect;  $S$ : subject to subject effect (this is a random effect);  $E$ : exon-to-exon effect (probeset differences independent to diagnosis);  $D * E$ : an exon (probesets) expresses differently in different diagnosis (alt-splicing dependent on diagnosis type);  $\varepsilon$ : is the error term

2. The design of the Affymetrix exon array 1.0 ST is from the manufacturer's website.

| Design Statistics Summary              |                                                                            |
|----------------------------------------|----------------------------------------------------------------------------|
| Probe Sets                             | 1.4 million <sup>#</sup>                                                   |
| Exon Clusters                          | > 1 million                                                                |
| Supported by Putative Full-Length mRNA | 289,961 probe sets                                                         |
| Supported by Ensembl Transcripts       | 306,583 probe sets                                                         |
| Supported by EST                       | 665,175 probe sets                                                         |
| Supported by Mouse or Rat mRNA         | 220,262 probe sets                                                         |
| Supported by Gene Prediction           | 883,105 probe sets                                                         |
| Probe Selection Region                 | Along the entire length of the transcripts                                 |
| Probes/Probe Selection Region          | 4 <sup>1</sup>                                                             |
| Background Subtraction Strategy        | Median intensity of up to 1,000 background probes with the same GC content |
| Total Features Per Array               | >5,500,000                                                                 |
| Interrogated Strand                    | Sense <sup>2</sup>                                                         |

<sup>1</sup> About 10 percent of the exon probe sets have fewer than four probes due to the probe selection region length and sequence constraints; <sup>2</sup> The probes tiled on the array are designed in the anti-sense orientation, requiring sense-strand labeled targets to be hybridized to the array. By convention, the array is called ST array representing the necessity of using sense targets (the labeled samples to be hybridized to the array). <sup>#</sup> We eliminated probes with common SNPs following method of Gamazon *et al.*, 2010 [30], that reduced the probeset count by ~350,000 probesets. Further we report only findings that are associated with full-length mRNA and have coverage by at least 2 probesets. This reduced the total probesets analysis to 11, 807 genes represented with 230,659 probesets.

## 3. Primer Table.

| Gene                           | Primers                    |                                |                                                 |                     |
|--------------------------------|----------------------------|--------------------------------|-------------------------------------------------|---------------------|
|                                | Forward                    | Reverse                        | Exon array<br>Probeset                          | Exon                |
| HLA-DPA1                       |                            |                                |                                                 |                     |
| qPCR                           | CCCTGAGGTG<br>ACCGTGTTTC   | GTCAATGTGGC<br>AGATGAGGGT      | RP inside of<br>probeset 2950343                | FP Exon3, RP Exon3  |
| qPCR – No SNP                  | ATCCAGCGT<br>TCCAACCAC     | AATGTGGCAGA<br>TGAGGGTGT       | RP overlap of<br>probeset 2950343               | FP Exon2, RP Exon3  |
| Sequencing                     | TGGACAAGAA<br>GGAGACCGTCT  | TTTATGATGA<br>GGACGGTGCC       |                                                 | FP Exon2, RP Exon4  |
| 96 CR transformed<br>LCLs      | Same as qPCR-No<br>SNP     | Same as qPCR-No<br>SNP         | Same as qPCR-No<br>SNP                          | Same as qPCR-No SNP |
| rs9469341<br>QPCR & sequencing | ATGTGGTCAT<br>CTGCATGGAA   | AGTGTGGTGG<br>GTGCCTGTA        |                                                 | Intron4, Intron 4   |
| rs9277341 QPCR<br>& sequencing | TCAGGGAAG<br>ACAGCCTGACCGG | CCTGCACCTGCC<br>ACTAATGACTCT   |                                                 | Intron1, Intron 1   |
| HLA-DRB1                       |                            |                                |                                                 |                     |
| qPCR                           | TTTGCTAAA<br>CCGTATGGCCT   | TGTGTTTGTCATAC<br>AGGGTGAATACA | RP overlap of<br>probeset 4048279               | Both Exon6          |
| qPCR – No SNP                  |                            |                                |                                                 |                     |
| Sequencing                     |                            |                                |                                                 |                     |
| 96 CR transformed<br>LCLs      | Same as qPCR               | Same as qPCR                   | Same as qPCR                                    | Same as qPCR        |
| CD74                           |                            |                                |                                                 |                     |
| qPCR                           | GCTCTTTCGT<br>CACCCCTGGAC  | CCTTGCTGCAT<br>TGTTATCTGCT     | FP and RP both<br>inside of probeset<br>2881380 | Both Exon5          |
| qPCR – No SNP                  |                            |                                |                                                 |                     |
| Sequencing                     |                            |                                |                                                 |                     |
| 96 CR transformed<br>LCLs      | Same as qPCR               | Same as qPCR                   | Same as qPCR                                    | Same as qPCR        |

## 4. Comparison of Exon microarray and qPCR genes from anterior cingulate.

| Gene<br>symbols | ExonArray                      |                         | qPCR                    |                          |                             |                         |                         |                               |
|-----------------|--------------------------------|-------------------------|-------------------------|--------------------------|-----------------------------|-------------------------|-------------------------|-------------------------------|
|                 | <i>p</i> -value                | Fold<br>Change          | <i>p</i> value          |                          |                             | Fold<br>Change          |                         |                               |
|                 | BD <i>vs</i><br>Control        | BD <i>vs</i><br>Control | BD <i>vs</i><br>Control | MD <i>vs.</i><br>Control | Schiz <i>vs.</i><br>Control | BD <i>vs</i><br>Control | MD <i>vs</i><br>Control | Schiz<br><i>vs</i><br>Control |
| ZFP36           | <b>1.04 × 10<sup>-5</sup></b>  | 0.54                    | <b>0.005</b>            | 0.907                    | <b>0.030</b>                | 0.40                    | 1.04                    | 0.57                          |
| HLA-DRA1        | <b>4.42 × 10<sup>-2</sup></b>  | 0.52                    | <b>0.008</b>            | 0.896                    | <b>0.008</b>                | 0.42                    | 0.97                    | 0.44                          |
| ADAMTS1         | <b>2.30 × 10<sup>-6</sup></b>  | 0.49                    | <b>0.010</b>            | 0.752                    | 0.168                       | 0.66                    | 1.07                    | 0.79                          |
| RGS1            | <b>1.77 × 10<sup>-4</sup></b>  | 0.47                    | <b>0.028</b>            | 0.274                    | <b>0.029</b>                | 0.26                    | 0.64                    | 0.25                          |
| NR4A1           | <b>2.50 × 10<sup>-9</sup></b>  | 0.45                    | <b>0.043</b>            | 0.667                    | 0.249                       | 0.33                    | 1.16                    | 0.62                          |
| GSTM1           | <b>1.14 × 10<sup>-2</sup></b>  | 0.49                    | <b>0.049</b>            | 0.089                    | 0.136                       | 0.25                    | 0.35                    | 0.41                          |
| C10ORF4         | <b>1.24 × 10<sup>-12</sup></b> | 0.58                    | 0.562                   | 0.744                    | <b>0.031</b>                | 0.90                    | 1.07                    | 0.62                          |
| TCF7L1          | <b>4.21 × 10<sup>-5</sup></b>  | 0.76                    | 0.187                   | 0.122                    | <b>0.045</b>                | 0.81                    | 0.78                    | 0.68                          |
| ESAM            | <b>6.81 × 10<sup>-3</sup></b>  | 0.73                    | 0.602                   | <b>0.038</b>             | 0.397                       | 0.87                    | 1.46                    | 0.85                          |
| FGFR3           | 5.52 × 10 <sup>-1</sup>        | 0.68                    | 0.912                   | 0.137                    | 0.746                       | 0.96                    | 1.43                    | 1.07                          |

The *p*-value numbers in bold show the significant differences for each comparison.
